# Supplementary material for: Boost up dielectric constant and push down dielectric loss of carbon nanotube/cyanate ester composites via gradient and layered structure design
Source: Royal Society of Chemistry journal article supplement (doi:10.1039/c5ta07611k), 2015-01-01
Supplement: c5ta07611k1.pdf [file c5ta07611k1.pdf]

Supporting Information

**Boost up Dielectric Constant and Push down Dielectric Loss of Carbon Nanotube/Cyanate Ester Composites through Gradient and Layered Structure Design**

*Binghao Wang, Limei Liu, Guozheng Liang\*, Li Yuan, Aijuan Gu\**

Jiangsu Key Laboratory of Advanced Functional Polymer Design and Application  
Department of Materials Science and Engineering  
College of Chemistry, Chemical Engineering and Materials Science  
Soochow University, Suzhou 215123, China

## S1. Dielectric properties of MWCNT/CE composites

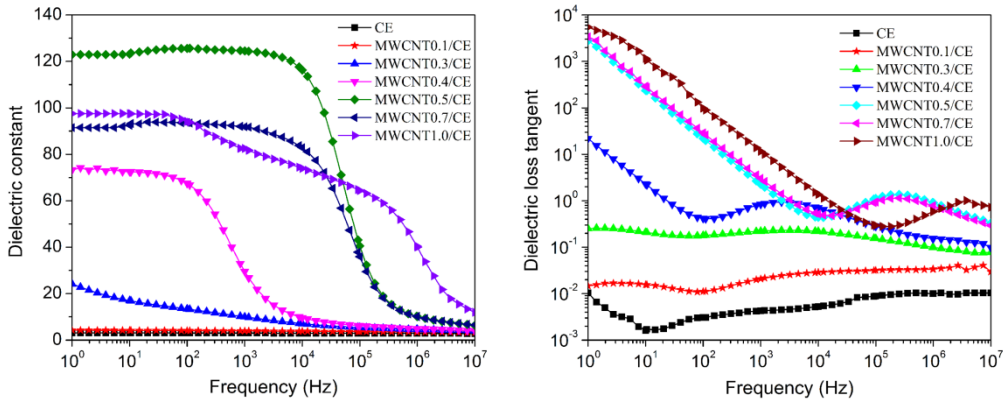

**Figure S1.** The real dielectric constant and loss tangent as a function of frequency for CE resin and MWCNT/CE composites with different loadings of MWCNTs

## S2. The percolation threshold of MWCNT/CE composites

According to the percolation theory, there is a universal relationship between the AC conductivity ( $\sigma$ ) and the loading of conductor ( $f$ ) as shown in **Equation S1**.

$$\sigma \propto (f - f_c)^t, f > f_c \quad (\text{S1})$$

where  $f_c$  is the percolation threshold,  $t$  is the critical conductivity exponent.

Using a least-squares fit for repeated experiments as shown in the inset plot of Figure S2b, the  $f_c$  value of MWCNT/CE composites was calculated to be 0.39 wt %.

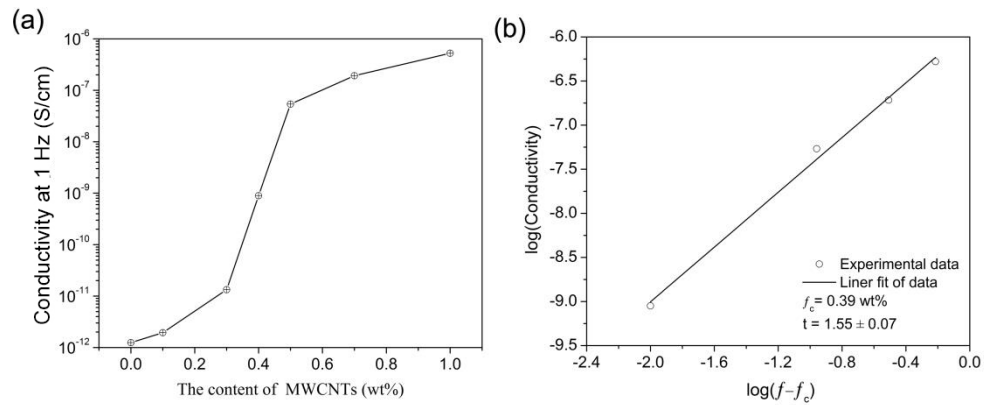

**Figure S2.** (a) The AC conductivity at 1 Hz as a function of MWCNTs concentration up to 1.0 wt% of MWCNT/CE composites. (b) The experimental data and linear fit of  $\log(\text{Conductivity})$  vs  $\log(f - f_c)$  for MWCNT/CE composites.

### S3. Conductivity

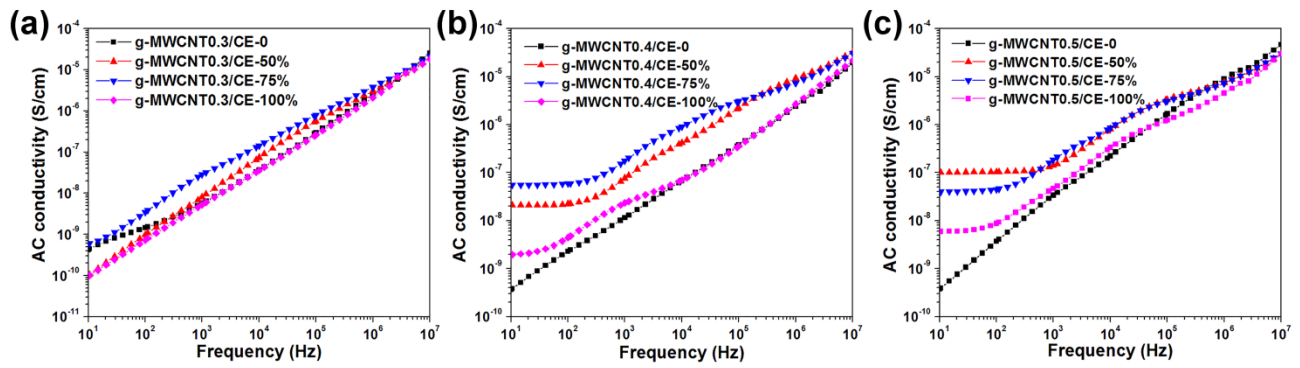

**Figure S3.** The AC conductivities of (a) g-MWCNT0.3/CE-x%, (b) g-MWCNT0.4/CE-x% and (c) g-MWCNT0.5/CE-x% nanocomposites over a wide frequency range.

#### S4. SEM images

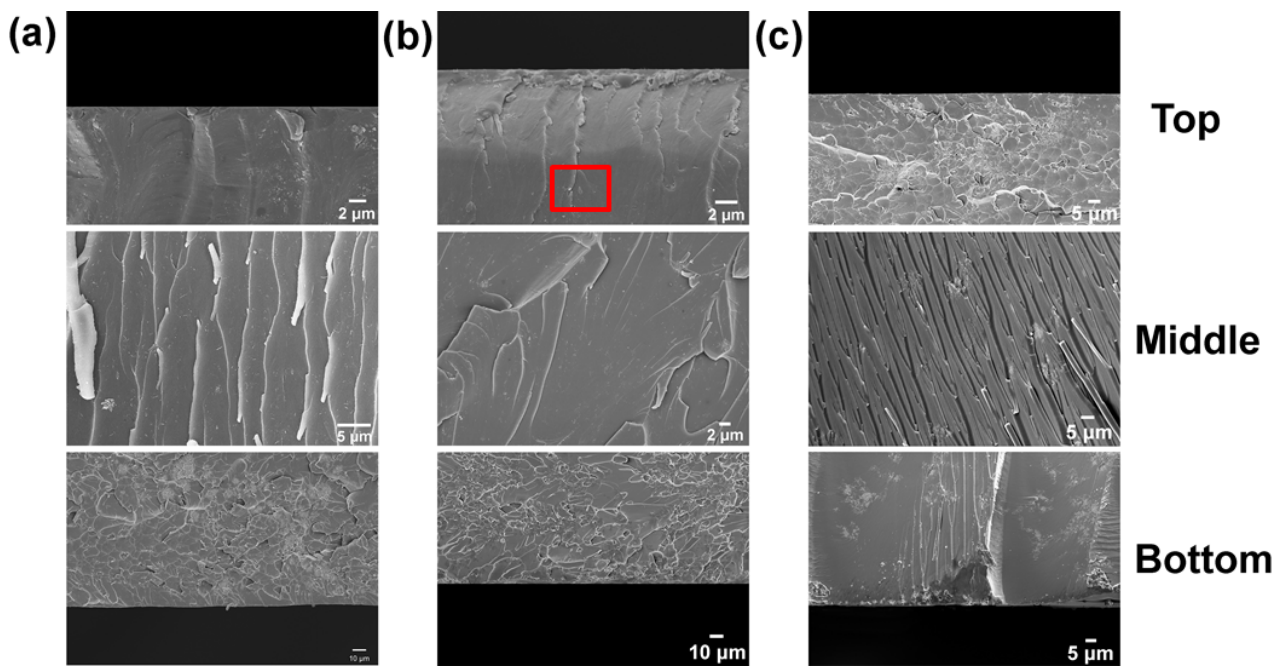

**Fig. S4** The SEM images of the top, middle, and bottom parts of the cross-sections along the thickness direction of (a) g-MWCNT0.5/CE-0, (b) g-MWCNT0.5/CE-75% and (c) g-MWCNT0.5/CE-100% composites.

## S5. Schematic diagrams and SEM images

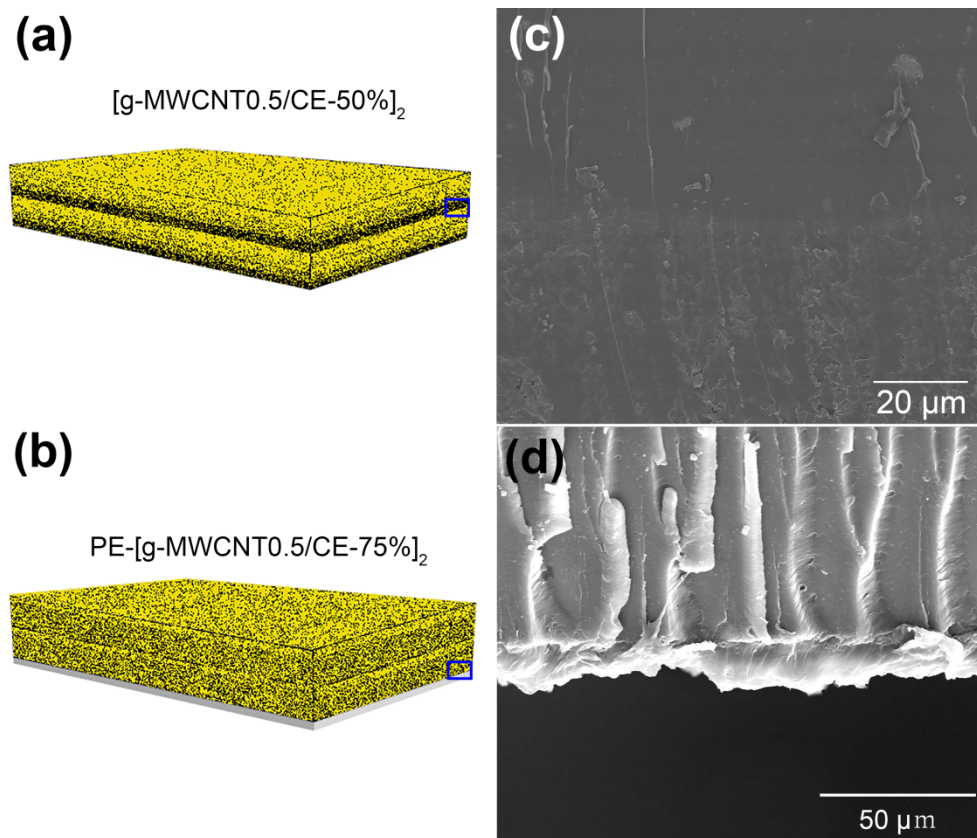

**Figure S5.** The schematic diagrams of  $[\text{g-MWCNT}0.5/\text{CE-50\%}]_2$  (a) and  $\text{PE-}[\text{g-MWCNT}0.5/\text{CE-75\%}]_2$  (b) materials. (c) and (d) are the SEM images of the interfaces between two layers labelled by blue squares in (a) and (b), respectively. The PE layer has a thickness of  $\sim 7\ \mu\text{m}$ .

**Table S1.** The parameters derived from TG and DTG curves.

| Sample                  | $T_{di}$ (°C) | $T_{max}$ (°C)  |                 |
|-------------------------|---------------|-----------------|-----------------|
|                         |               | $T_{max1}$ (°C) | $T_{max2}$ (°C) |
| Top of MWCNT0.3/CE-0    | 339.0         | 427.0           | 602.6           |
| Bottom of MWCNT0.3/CE-0 | 395.9         | 433.5           | 606.4           |
| Top of MWCNT0.4/CE-0    | 331.0         | 427.7           | 605.6           |
| Bottom of MWCNT0.4/CE-0 | 402.9         | 434.8           | 611.9           |
| Top of MWCNT0.5/CE-0    | 350.3         | 431.0           | 608.9           |
| Bottom of MWCNT0.5/CE-0 | 407.7         | 434.1           | 620.3           |
| MWCNTs                  | 468.3         |                 | 562.9           |

**Table S2.** Key parameters of high- $k$  polymer composites with low dielectric loss. <sup>a)</sup>

| Filler <sup>b)</sup>             | Filler loading | Polymer matrix <sup>c)</sup> | $\varepsilon_{p,\max}$<br>( $\tan \delta_p$ ) | $\varepsilon_{c,\max}$ | $\tan \delta_c$ | $\eta$ <sup>d)</sup> | Reference |
|----------------------------------|----------------|------------------------------|-----------------------------------------------|------------------------|-----------------|----------------------|-----------|
| Hydrazine reduced GO             | 1.7 vol%       | P(VDF-TrFE-<br>CFE)          | 57<br>(0.05)                                  | 10000                  | 2               | 4.39                 | [S1]      |
| Graphene-TiO <sub>2</sub> sheets | 10.9 vol%      | PS                           | 2.7<br>(0.004)                                | 1741                   | 0.39            | 6.61                 | [S2]      |
| MWCNTs                           | 0.5 wt%        | CE                           | 3.1<br>(0.004)                                | 306                    | 0.21            | 4.7                  | [S3]      |
| Chlorination reduced GO          | 0.5 wt%        | CEP                          | 17<br>(0.04)                                  | 169                    | 0.05            | 7.95                 | [S4]      |
| MWCNTs                           | 0.5 wt%        | CE                           | 3.1<br>(0.004)                                | 168                    | 0.006           | 36.13                | [S5]      |
| Rutile rods                      | 36.9 vol%      | PS                           | 2.0<br>(0.008)                                | 80                     | 0.14            | 2.29                 | [S6]      |
| Graphene                         | 0.17wt%        | CEP                          | 17<br>(0.09)                                  | 77                     | 0.16            | 2.55                 | [S7]      |
| Graphene nanosheets              | 4.0 vol%       | P(VDF-TrFE-<br>DB)           | 12<br>(0.04)                                  | 74                     | 0.08            | 3.08                 | [S8]      |
| Carbon nanofibers                | 2.5 wt%        | PVDF                         | 13<br>(0.13)                                  | 68                     | 0.06            | 11.33                | [S9]      |
| MWCNTs                           | 25 vol%        | PSF                          | 5<br>(0.02)                                   | 58                     | 0.05            | 4.64                 | [S10]     |
| PPy coated MWCNTs                | 10 vol%        | PS                           | 2.7<br>(0.004)                                | 44                     | 0.07            | 0.93                 | [S11]     |
| rGO-MWCNTs                       | 0.062 wt%      | CEP                          | 15<br>(0.036)                                 | 32                     | 0.051           | 1.61                 | [S12]     |
| BaTiO <sub>3</sub>               | 10.8 vol%      | PVDF-TrFE                    | 14<br>(0.02)                                  | 30                     | 0.03            | 1.43                 | [S13]     |
| MWCNTs                           | 0.34 vol%      | PP                           | 2.4<br>(0.002)                                | 30                     | 0.06            | 0.42                 | [S14]     |
| GO                               | 5.0 wt%        | PDMS                         | 3.1<br>(0.01)                                 | 8                      | 0.005           | 5.16                 | [S15]     |
| MWCNTs                           | 0.5 wt%        | CE                           | 3.1<br>(0.004)                                | 1027                   | 0.017           | 77.95                | This work |

a) The data are arranged with decreasing dielectric constant of the composites. Some parameters not reported directly in the references are derived from the corresponding curves.  $\varepsilon_{p,\max}$ : The maximum dielectric constant of polymer matrix.  $\tan \delta_p$ : dielectric loss tangent of polymer matrix at corresponding frequencies.  $\varepsilon_{c,\max}$ : The maximum dielectric constant of the composites.  $\tan \delta_c$ : dielectric loss tangent of the composites at corresponding frequencies.

- b) MWCNTs: Multi-wall carbon nanotubes, PPy: Polypyrrole, GO: Graphene oxide, BaTiO<sub>3</sub>: Barium titanate.
- c) P(VDF-TrFE-CFE): Poly(vinylidene fluoride-co-trifluoroethylene- co-chlorofluoroethylene); PS: Polystyrene; CE: Cyanate ester; CEP: Cyanoethyl pullulan polymer; P(VDF-TrFE-DB): Poly-(vinylidene fluoride-co-trifluoroethylene) with double bonds; PVDF: Poly(vinylidene fluoride); PSF: Polysulfone; PVDF-TrFE: Poly(vinylidene fluoride-co-trifluoroethylene); PP: Polypropylene; PDMS: Poly(dimethyl siloxane).
- d)  $\eta$  is defined as the proportion of the variation of dielectric constant to the variation of dielectric loss tangent, shown in **Equation S2**.

$$\eta = \varepsilon_{c,\max} \tan \delta_p / \varepsilon_{p,\max} \tan \delta_c \quad (\text{S2})$$



## References

- [S1] M. N. Almadhoun, M. N. Hedhili, I. N. Odeh, P. Xavier, U. S. Bhansali, H. N. Alshareef, *Chem. Mater.* **2014**, *26*, 2856.
- [S2] C. Wu, X. Huang, L. Xie, X. Wu, J. Yu, P. Jiang, *J. Mater. Chem.* **2011**, *21*, 17729.
- [S3] B. H. Wang, D. K. Qin, G. Z. Liang, A. J. Gu, L. M. Liu, L. Yuan, *J. Phys. Chem. C* **2013**, *117*, 15487.
- [S4] J. Y. Kim, W. H. Lee, J. W. Suk, J. R. Potts, H. Chou, I. N. Kholmanov, R. D. Piner, J. Lee, D. Akinwande, R. S. Ruoff, *Adv. Mater.* **2013**, *25*, 2308.
- [S5] B. H. Wang, G. Z. Liang, Y. C. Jiao, A. J. Gu, L. M. Liu, L. Yuan, W. Zhang, *Carbon* **2013**, *54*, 224.
- [S6] M. Crippa, A. Bianchi, D. Cristofori, M. D'Arienzo, F. Merletti, F. Morazzoni, R. Scotti, R. Simonutti, *J. Mater. Chem. C* **2013**, *1*, 484.
- [S7] J. Y. Kim, J. Lee, W. H. Lee, I. N. Kholmanov, J. W. Suk, T. Kim, Y. Hao, H. Chou, D. Akinwande, R. S. Ruoff, *ACS Nano* **2014**, *8*, 269.
- [S8] F. Wen, Z. Xu, S. Tan, W. Xia, X. Wei, Z. Zhang, *ACS Appl. Mater. Interfaces* **2013**, *5*, 9411.
- [S9] L. L. Sun, B. Li, Y. Zhao, G. Mitchell, W. H. Zhong, *Nanotechnology* **2010**, *21*, 305702.
- [S10] H. Liu, Y. Shen, Y. Song, C. W. Nan, Y. Lin, X. Yang, *Adv. Mater.* **2011**, *23*, 5104.
- [S11] C. Yang, Y. Lin, C. W. Nan, *Carbon* **2009**, *47*, 1096.
- [S12] J. Y. Kim, T. Kim, J. W. Suk, H. Chou, J. H. Jang, J. H. Lee, I. N. Kholmanov, D. Akinwande, R. S. Ruoff, *Small* **2014**, *10*, 3405.
- [S13] Y. Song, Y. Shen, H. Liu, Y. Lin, M. Li, C.-W. Nan, *J. Mater. Chem.* **2012**, *22*, 8063.
- [S14] A. Ameli, M. Nofar, C. B. Park, P. Potechke, G. Rizvi, *Carbon* **2014**, *71*, 206.
- [S15] Z. Wang, J. K. Nelson, H. Hillborg, S. Zhao, L. S. Schadler, *Adv. Mater.* **2012**, *24*, 3134.
